# Supplementary material for: Unique microbial landscape in the human oropharynx during different types of acute respiratory tract infections
Source: PubMed Central journal article supplement (PMC10364384; doi:10.1186/s40168-023-01597-9), 2023-07-24
Supplement: 40168_2023_1597_MOESM1_ESM.pdf [file 40168_2023_1597_MOESM1_ESM.pdf]

**Table S1.** List of primers used for multiplex qPCR.

| <b>Target virus, Gene</b> | <b>Primer and probe sequences</b>                                                                                                                 | <b>Fluorescent and quenched signal</b> |
|---------------------------|---------------------------------------------------------------------------------------------------------------------------------------------------|----------------------------------------|
| Influenza A virus,<br>M1  | F: GACCRATCCTGTACCTCTGAC<br>R: AGGGCATTYTTGGACAAAKCGTCTA<br>P: TGCAGTCCTCGCTCACTGGGCACG                                                           | 5'-FAM, 3'-BHQ1                        |
| Influenza B virus,<br>HA  | F: AAATACGGTGGATTAAATAAAAAGCAA<br>R: CCAGCAATAGCTCCGAAGAAA<br>P: CACCCATATTGGGCAATTCCTAT                                                          | 5'-HEX, 3'-BHQ1                        |
| RSV, matrix protein       | F: GCAAATATGGAAACATACGTGAACA<br>R: GCACCCATATTGTWAGTGATGCA<br>P: CTTCACGAAGGCTCCACATACACAGCWG                                                     | 5'-TexasRed, 3'-<br>BHQ2               |
| Rhinovirus, 5' UTR        | F1: GGTGTGAAGAGCCSRTGTGCT<br>F2: GGTGTGAAGACTCGCATGTGCT<br>F3: GGGTGYGAAGAGYCTANTGTGCT<br>R3: GGACACCCAAAGTAGTYGGTYC<br>P: CCGGCCCTGAATGYGGCTAAYC | 5'-CY5, 3'-MGB                         |

**Table S2.** The differential genera between virus-positive and negative groups.

| <b>Difference genera in LEfSe analysis</b>                | <b>Enriched groups</b> | <b>LDA value</b> | <b>P value</b> | <b>Comparison between groups</b> |
|-----------------------------------------------------------|------------------------|------------------|----------------|----------------------------------|
| <i>Aequorivita</i>                                        | FluA                   | 3.192            | 0.035          | FluA vs Health                   |
| <i>Truepera</i>                                           | FluA                   | 3.372            | 0.035          | FluA vs Health                   |
| <i>Staphylococcus</i>                                     | FluA                   | 2.600            | 0.029          | FluA vs Health                   |
| <i>uncultured Desulfocaldu ssp.</i>                       | FluA                   | 3.148            | 0.035          | FluA vs Health                   |
| <i>Cardiobacterium</i>                                    | FluA                   | 2.399            | 0.046          | FluA vs Health                   |
| <i>Planktosalinus</i>                                     | FluA                   | 3.164            | 0.035          | FluA vs Health                   |
| <i>Tyzzarella 3</i>                                       | FluA                   | 2.518            | 0.003          | FluA vs Health                   |
| <i>Faecalibaculum</i>                                     | FluA                   | 2.948            | 0.035          | FluA vs Health                   |
| <i>Allorhizobium-Neorhizobium-Pararhizobium-Rhizobium</i> | FluA                   | 2.715            | 0.035          | FluA vs Health                   |
| <i>Ralstonia</i>                                          | FluA                   | 3.324            | 0.024          | FluA vs Health                   |
| <i>Arenimonas</i>                                         | FluA                   | 3.299            | 0.035          | FluA vs Health                   |
| <i>Actinomadura</i>                                       | FluA                   | 3.046            | 0.035          | FluA vs Health                   |
| <i>Lactobacillus</i>                                      | FluA                   | 2.333            | 0.002          | FluA vs Health                   |
| <i>Petrimonas</i>                                         | FluA                   | 2.296            | 0.031          | FluA vs Health                   |
| <i>Geobacter</i>                                          | FluA                   | 3.085            | 0.035          | FluA vs Health                   |
| <i>Veillonella</i>                                        | FluA                   | 4.287            | 0.013          | FluA vs Health                   |
| <i>Dietzia</i>                                            | FluA                   | 3.460            | 0.035          | FluA vs Health                   |
| <i>Bosea</i>                                              | FluA                   | 3.330            | 0.035          | FluA vs Health                   |
| <i>Pseudoramibacter</i>                                   | FluA                   | 2.291            | 0.003          | FluA vs Health                   |
| <i>Lachnospiraceae NK4A136</i>                            | FluA                   | 2.330            | 0.029          | FluA vs Health                   |
| <i>Lachnoanaero baculum</i>                               | FluA                   | 3.130            | 0.014          | FluA vs Health                   |
| <i>Solobacterium</i>                                      | FluA                   | 3.083            | 0.018          | FluA vs Health                   |
| <i>Luteimonas</i>                                         | FluA                   | 3.116            | 0.035          | FluA vs Health                   |
| <i>Ornithobacterium</i>                                   | FluA                   | 3.161            | 0.035          | FluA vs Health                   |
| <i>Uncultured Spingobacteriia</i>                         | FluA                   | 2.982            | 0.035          | FluA vs Health                   |
| <i>Mogibacterium</i>                                      | FluA                   | 2.244            | 0.003          | FluA vs Health                   |
| <i>Phycococcus</i>                                        | FluA                   | 3.016            | 0.035          | FluA vs Health                   |
| <i>Atopobium</i>                                          | FluA                   | 3.623            | <0.001         | FluA vs Health                   |
| <i>Phascolarcto bacterium</i>                             | FluA                   | 2.530            | 0.027          | FluA vs Health                   |
| <i>Pantoea</i>                                            | FluA                   | 2.314            | 0.029          | FluA vs Health                   |
| <i>Macrocooccus</i>                                       | FluA                   | 3.150            | 0.035          | FluA vs Health                   |
| <i>Gracilibacteria bacterium oral taxon 873</i>           | Health                 | 2.282            | 0.022          | FluA vs Health                   |
| <i>Filifactor</i>                                         | Health                 | 2.722            | 0.048          | FluA vs Health                   |
| <i>Actinobacillus</i>                                     | Health                 | 3.801            | <0.001         | FluA vs Health                   |
| <i>Streptococcus</i>                                      | Health                 | 4.551            | 0.043          | FluA vs Health                   |
| <i>Corynebacterium 1</i>                                  | Health                 | 2.048            | 0.043          | FluA vs Health                   |
| <i>Granulicatella</i>                                     | Health                 | 3.669            | 0.050          | FluA vs Health                   |
| <i>Abiotrophia</i>                                        | FluB                   | 2.791            | <0.001         | FluB vs Health                   |

|                                                              |        |       |        |                |
|--------------------------------------------------------------|--------|-------|--------|----------------|
| <i>Streptobacillus</i>                                       | FluB   | 2.544 | 0.045  | FluB vs Health |
| <i>Veillonella</i>                                           | FluB   | 4.312 | <0.001 | FluB vs Health |
| <i>Fusobacterium</i>                                         | FluB   | 4.218 | 0.014  | FluB vs Health |
| <i>F0058</i>                                                 | FluB   | 2.250 | 0.030  | FluB vs Health |
| <i>Pseudoramibacter</i>                                      | FluB   | 2.627 | 0.004  | FluB vs Health |
| <i>Eubacterium nodatum</i> group                             | FluB   | 2.836 | 0.022  | FluB vs Health |
| <i>Prevotella</i>                                            | FluB   | 3.929 | 0.014  | FluB vs Health |
| <i>Lachnoanaerobaculum</i>                                   | FluB   | 2.874 | 0.013  | FluB vs Health |
| <i>F0332</i>                                                 | FluB   | 2.237 | 0.037  | FluB vs Health |
| <i>Atopobium</i>                                             | FluB   | 3.038 | 0.001  | FluB vs Health |
| <i>Arcobacter</i>                                            | FluB   | 2.812 | 0.037  | FluB vs Health |
| <i>Leptotrichia</i>                                          | Health | 3.964 | <0.001 | FluB vs Health |
| <i>Sphingomonas</i>                                          | Health | 3.544 | 0.017  | FluB vs Health |
| <i>Brevundimonas</i>                                         | Health | 3.439 | 0.039  | FluB vs Health |
| <i>Campylobacter</i>                                         | Health | 2.574 | 0.005  | FluB vs Health |
| <i>Gracilibacteria bacterium oral</i><br><i>taxon 873</i>    | Health | 2.258 | 0.004  | FluB vs Health |
| <i>Ruminococcaceae UCG_014</i>                               | Health | 3.203 | 0.010  | FluB vs Health |
| <i>Prevotella 1</i>                                          | Health | 2.861 | 0.033  | FluB vs Health |
| <i>Prevotella 2</i>                                          | Health | 3.050 | 0.025  | FluB vs Health |
| <i>Alteromonas</i>                                           | Health | 3.139 | 0.017  | FluB vs Health |
| <i>Ralstonia</i>                                             | Health | 2.530 | 0.001  | FluB vs Health |
| <i>Sediminispirochaeta</i>                                   | Health | 3.145 | 0.039  | FluB vs Health |
| <i>Mobiluncus</i>                                            | Health | 2.252 | 0.017  | FluB vs Health |
| <i>Mesorhizobium</i>                                         | Health | 3.180 | 0.017  | FluB vs Health |
| <i>Catonella</i>                                             | Health | 2.828 | <0.001 | FluB vs Health |
| <i>Peptostreptococcus</i>                                    | Health | 2.681 | 0.002  | FluB vs Health |
| <i>Aggregatibacter</i>                                       | Health | 3.166 | 0.008  | FluB vs Health |
| <i>Filifactor</i>                                            | Health | 2.610 | 0.008  | FluB vs Health |
| <i>Bergeyella</i>                                            | Health | 2.589 | 0.022  | FluB vs Health |
| <i>Synechococcus CC9902</i>                                  | Health | 3.251 | 0.039  | FluB vs Health |
| <i>Treponema 2</i>                                           | Health | 2.556 | 0.010  | FluB vs Health |
| <i>Actinobacillus</i>                                        | Health | 3.313 | <0.001 | FluB vs Health |
| <i>Pseudomonas</i>                                           | Health | 2.250 | <0.001 | FluB vs Health |
| <i>Acinetobacter</i>                                         | Health | 2.447 | 0.040  | FluB vs Health |
| <i>Streptococcus</i>                                         | Health | 4.334 | 0.014  | FluB vs Health |
| <i>Uruburuella</i>                                           | Health | 2.831 | <0.001 | FluB vs Health |
| <i>Granulicatella</i>                                        | Health | 3.582 | <0.001 | FluB vs Health |
| <i>Eubacterium yurii</i> group                               | Health | 2.308 | 0.009  | FluB vs Health |
| <i>Leptotrichia</i>                                          | Health | 3.901 | 0.013  | HRV vs Health  |
| <i>Gracilibacteria bacterium oral</i><br><i>taxon 873</i>    | Health | 2.382 | 0.005  | HRV vs Health  |
| <i>Bacteroidia bacterium feline</i><br><i>oral taxon 312</i> | Health | 2.917 | 0.050  | HRV vs Health  |

|                                                      |        |       |        |               |
|------------------------------------------------------|--------|-------|--------|---------------|
| <i>Ruminococcaceae UCG_014</i>                       | Health | 3.351 | <0.001 | HRV vs Health |
| <i>Prevotella 2</i>                                  | Health | 3.121 | 0.001  | HRV vs Health |
| <i>Ralstonia</i>                                     | Health | 2.666 | 0.012  | HRV vs Health |
| <i>Peptostreptococcus</i>                            | Health | 2.829 | <0.001 | HRV vs Health |
| <i>Aggregatibacter</i>                               | Health | 2.993 | 0.010  | HRV vs Health |
| <i>Pseudomonas</i>                                   | Health | 2.472 | 0.001  | HRV vs Health |
| <i>F0332</i>                                         | Health | 2.362 | 0.005  | HRV vs Health |
| <i>Acinetobacter</i>                                 | Health | 2.579 | 0.011  | HRV vs Health |
| <i>Haemophilus</i>                                   | Health | 4.126 | 0.025  | HRV vs Health |
| <i>Granulicatella</i>                                | Health | 3.832 | 0.001  | HRV vs Health |
| <i>Abiotrophia</i>                                   | HRV    | 2.785 | <0.001 | HRV vs Health |
| <i>Veillonella</i>                                   | HRV    | 4.206 | 0.002  | HRV vs Health |
| <i>F0058</i>                                         | HRV    | 2.589 | 0.039  | HRV vs Health |
| <i>Actinobacillus</i>                                | HRV    | 3.400 | 0.036  | HRV vs Health |
| <i>Pseudoramibacter</i>                              | HRV    | 3.281 | 0.001  | HRV vs Health |
| <i>Scardovia</i>                                     | HRV    | 2.681 | 0.013  | HRV vs Health |
| <i>Eubacterium nodatum group</i>                     | HRV    | 2.662 | 0.033  | HRV vs Health |
| <i>Prevotella</i>                                    | HRV    | 3.876 | 0.021  | HRV vs Health |
| <i>Atopobium</i>                                     | HRV    | 2.935 | 0.018  | HRV vs Health |
| <i>Gracilibacteria bacterium oral taxon 873</i>      | Health | 2.522 | 0.015  | RSV vs Health |
| <i>Ruminococcaceae UCG_014</i>                       | Health | 3.268 | 0.031  | RSV vs Health |
| <i>Prevotella 2</i>                                  | Health | 3.243 | 0.005  | RSV vs Health |
| <i>Oribacterium</i>                                  | Health | 3.041 | 0.009  | RSV vs Health |
| <i>Catonella</i>                                     | Health | 2.823 | 0.003  | RSV vs Health |
| <i>Peptostreptococcus</i>                            | Health | 2.960 | <0.001 | RSV vs Health |
| <i>Aggregatibacter</i>                               | Health | 3.295 | 0.003  | RSV vs Health |
| <i>Pseudomonas</i>                                   | Health | 2.580 | 0.001  | RSV vs Health |
| <i>Solobacterium</i>                                 | Health | 2.875 | 0.003  | RSV vs Health |
| <i>Acinetobacter</i>                                 | Health | 2.678 | 0.039  | RSV vs Health |
| <i>Uruburuella</i>                                   | Health | 3.015 | 0.033  | RSV vs Health |
| <i>Haemophilus</i>                                   | Health | 4.178 | 0.010  | RSV vs Health |
| <i>Granulicatella</i>                                | Health | 3.897 | 0.002  | RSV vs Health |
| <i>Eubacterium yurii group</i>                       | Health | 2.495 | 0.009  | RSV vs Health |
| <i>Prevotella 6</i>                                  | RSV    | 2.574 | 0.038  | RSV vs Health |
| <i>Clostridiales bacterium canine oral taxon 260</i> | RSV    | 3.318 | 0.004  | RSV vs Health |
| <i>Abiotrophia</i>                                   | RSV    | 2.843 | <0.001 | RSV vs Health |
| <i>Anaeroglobus</i>                                  | RSV    | 2.805 | <0.001 | RSV vs Health |
| <i>Veillonella</i>                                   | RSV    | 4.338 | 0.034  | RSV vs Health |
| <i>F0332</i>                                         | RSV    | 2.469 | 0.001  | RSV vs Health |

**Table S3, In the random forest model with 100 resamplings, the Mean Decrease Accuracy from group 1 and group 2 was used for the Wilcoxon test.**

| Taxon                                                                                                                             | group1 | group2    | p        | p.adj    | p.signif | method   |
|-----------------------------------------------------------------------------------------------------------------------------------|--------|-----------|----------|----------|----------|----------|
| <i>p__Firmicutes;c__Bacilli;o__Lactobacillales;f__Carnobacteriaceae;g__Granulicatella</i>                                         | FluA   | FluB      | 3.14E-17 | 2.80E-16 | ****     | Wilcoxon |
| <i>p__Firmicutes;c__Bacilli;o__Lactobacillales;f__Carnobacteriaceae;g__Granulicatella</i>                                         | FluA   | RSV       | 0.002479 | 0.0074   | **       | Wilcoxon |
| <i>p__Firmicutes;c__Bacilli;o__Lactobacillales;f__Carnobacteriaceae;g__Granulicatella</i>                                         | FluA   | HRV       | 0.013809 | 0.028    | *        | Wilcoxon |
| <i>p__Firmicutes;c__Bacilli;o__Lactobacillales;f__Carnobacteriaceae;g__Granulicatella</i>                                         | FluA   | Infection | 4.25E-09 | 3.00E-08 | ****     | Wilcoxon |
| <i>p__Firmicutes;c__Bacilli;o__Lactobacillales;f__Carnobacteriaceae;g__Granulicatella</i>                                         | FluB   | RSV       | 2.01E-11 | 1.60E-10 | ****     | Wilcoxon |
| <i>p__Firmicutes;c__Bacilli;o__Lactobacillales;f__Carnobacteriaceae;g__Granulicatella</i>                                         | FluB   | HRV       | 2.15E-18 | 2.20E-17 | ****     | Wilcoxon |
| <i>p__Firmicutes;c__Bacilli;o__Lactobacillales;f__Carnobacteriaceae;g__Granulicatella</i>                                         | FluB   | Infection | 0.000187 | 0.00093  | ***      | Wilcoxon |
| <i>p__Firmicutes;c__Bacilli;o__Lactobacillales;f__Carnobacteriaceae;g__Granulicatella</i>                                         | RSV    | HRV       | 0.138501 | 0.14     | ns       | Wilcoxon |
| <i>p__Firmicutes;c__Bacilli;o__Lactobacillales;f__Carnobacteriaceae;g__Granulicatella</i>                                         | RSV    | Infection | 0.001067 | 0.0043   | **       | Wilcoxon |
| <i>p__Firmicutes;c__Bacilli;o__Lactobacillales;f__Carnobacteriaceae;g__Granulicatella</i>                                         | HRV    | Infection | 3.64E-07 | 2.20E-06 | ****     | Wilcoxon |
| <i>p__Bacteroidetes;c__Bacteroidia;o__Bacteroidales;f__Prevotellaceae;g__Prevotella 7;s__Prevotella sp. oral clone P4PB_83 P2</i> | FluA   | FluB      | 1.11E-26 | 1.00E-25 | ****     | Wilcoxon |
| <i>p__Bacteroidetes;c__Bacteroidia;o__Bacteroidales;f__Prevotellaceae;g__Prevotella 7;s__Prevotella sp. oral clone P4PB_83 P2</i> | FluA   | RSV       | 8.13E-09 | 2.40E-08 | ****     | Wilcoxon |
| <i>p__Bacteroidetes;c__Bacteroidia;o__Bacteroidales;f__Prevotellaceae;g__Prevotella 7;s__Prevotella sp. oral clone P4PB_83 P2</i> | FluA   | HRV       | 0.261253 | 0.26     | ns       | Wilcoxon |
| <i>p__Bacteroidetes;c__Bacteroidia;o__Bacteroidales;f__Prevotellaceae;g__Prevotella 7;s__Prevotella sp. oral clone P4PB_83 P2</i> | FluA   | Infection | 2.63E-18 | 1.80E-17 | ****     | Wilcoxon |
| <i>p__Bacteroidetes;c__Bacteroidia;o__Bacteroidales;f__Prevotellaceae;g__Prevotella 7;s__Prevotella sp. oral clone P4PB_83 P2</i> | FluB   | RSV       | 1.18E-14 | 7.10E-14 | ****     | Wilcoxon |
| <i>p__Bacteroidetes;c__Bacteroidia;o__Bacteroidales;f__Prevotellaceae;g__Prevotella 7;s__Prevotella sp. oral clone P4PB_83 P2</i> | FluB   | HRV       | 1.70E-31 | 1.70E-30 | ****     | Wilcoxon |
| <i>p__Bacteroidetes;c__Bacteroidia;o__Bacteroidales;f__Prevotellaceae;g__Prevotella 7;s__Prevotella sp. oral clone P4PB_83 P2</i> | FluB   | Infection | 3.87E-11 | 1.50E-10 | ****     | Wilcoxon |
| <i>p__Bacteroidetes;c__Bacteroidia;o__Bacteroidales;f__Prevotellaceae;g__Prevotella 7;s__Prevotella sp. oral clone P4PB_83 P2</i> | RSV    | HRV       | 1.78E-08 | 3.60E-08 | ****     | Wilcoxon |
| <i>p__Bacteroidetes;c__Bacteroidia;o__Bacteroidales;f__Prevotellaceae;g__Prevotella 7;s__Prevotella sp. oral clone P4PB_83 P2</i> | RSV    | Infection | 3.47E-14 | 1.70E-13 | ****     | Wilcoxon |
| <i>p__Bacteroidetes;c__Bacteroidia;o__Bacteroidales;f__Prevotellaceae;g__Prevotella 7;s__Prevotella sp. oral clone P4PB_83 P2</i> | HRV    | Infection | 2.73E-23 | 2.20E-22 | ****     | Wilcoxon |
| <i>p__Proteobacteria;c__Gammaproteobacteria;o__Pasteurellales;f__Pasteurellaceae;g__Haemophilus</i>                               | FluA   | FluB      | 0.066916 | 0.33     | ns       | Wilcoxon |
| <i>p__Proteobacteria;c__Gammaproteobacteria;o__Pasteurellales;f__Pasteurellaceae;g__Haemophilus</i>                               | FluA   | RSV       | 0.002375 | 0.024    | **       | Wilcoxon |
| <i>p__Proteobacteria;c__Gammaproteobacteria;o__Pasteurellales;f__Pasteurellaceae;g__Haemophilus</i>                               | FluA   | HRV       | 0.008529 | 0.06     | **       | Wilcoxon |
| <i>p__Proteobacteria;c__Gammaproteobacteria;o__Pasteurellales;f__Pasteurellaceae;g__Haemophilus</i>                               | FluA   | Infection | 0.203285 | 0.81     | ns       | Wilcoxon |
| <i>p__Proteobacteria;c__Gammaproteobacteria;o__Pasteurellales;f__Pasteurellaceae;g__Haemophilus</i>                               | FluB   | RSV       | 0.003885 | 0.031    | **       | Wilcoxon |
| <i>p__Proteobacteria;c__Gammaproteobacteria;o__Pasteurellales;f__Pasteurellaceae;g__Haemophilus</i>                               | FluB   | HRV       | 0.002361 | 0.024    | **       | Wilcoxon |
| <i>p__Proteobacteria;c__Gammaproteobacteria;o__Pasteurellales;f__Pasteurellaceae;g__Haemophilus</i>                               | FluB   | Infection | 0.312946 | 0.94     | ns       | Wilcoxon |
| <i>p__Proteobacteria;c__Gammaproteobacteria;o__Pasteurellales;f__Pasteurellaceae;g__Haemophilus</i>                               | RSV    | HRV       | 0.626976 | 1        | ns       | Wilcoxon |
| <i>p__Proteobacteria;c__Gammaproteobacteria;o__Pasteurellales;f__Pasteurellaceae;g__Haemophilus</i>                               | RSV    | Infection | 0.021042 | 0.13     | *        | Wilcoxon |
| <i>p__Proteobacteria;c__Gammaproteobacteria;o__Pasteurellales;f__Pasteurellaceae;g__Haemophilus</i>                               | HRV    | Infection | 0.792703 | 1        | ns       | Wilcoxon |
| <i>p__Proteobacteria;c__Gammaproteobacteria;o__Pasteurellales;f__Pasteurellaceae;g__Actinobacillus</i>                            | FluA   | FluB      | 5.23E-08 | 2.60E-07 | ****     | Wilcoxon |
| <i>p__Proteobacteria;c__Gammaproteobacteria;o__Pasteurellales;f__Pasteurellaceae;g__Actinobacillus</i>                            | FluA   | RSV       | 3.17E-07 | 1.30E-06 | ****     | Wilcoxon |
| <i>p__Proteobacteria;c__Gammaproteobacteria;o__Pasteurellales;f__Pasteurellaceae;g__Actinobacillus</i>                            | FluA   | HRV       | 7.28E-12 | 5.80E-11 | ****     | Wilcoxon |











|                                                                                                                                                                             |      |           |          |          |      |          |
|-----------------------------------------------------------------------------------------------------------------------------------------------------------------------------|------|-----------|----------|----------|------|----------|
| <i>p__Bacteroidetes;c__Bacteroidia;o__Bacteroidales;f__Prevotellaceae;g__Alloprevotella;s__uncultured Prevotellaceae bacterium</i>                                          | HRV  | Infection | 1.53E-16 | 1.40E-15 | **** | Wilcoxon |
| <i>p__Firmicutes;c__Clostridia;o__Clostridiales;f__Peptostreptococcaceae;g__[Eubacterium] yurii group;s__uncultured bacterium</i>                                           | FluA | FluB      | 3.14E-17 | 2.80E-16 | **** | Wilcoxon |
| <i>p__Firmicutes;c__Clostridia;o__Clostridiales;f__Peptostreptococcaceae;g__[Eubacterium] yurii group;s__uncultured bacterium</i>                                           | FluA | RSV       | 0.002479 | 0.0074   | **   | Wilcoxon |
| <i>p__Firmicutes;c__Clostridia;o__Clostridiales;f__Peptostreptococcaceae;g__[Eubacterium] yurii group;s__uncultured bacterium</i>                                           | FluA | HRV       | 0.013809 | 0.028    | *    | Wilcoxon |
| <i>p__Firmicutes;c__Clostridia;o__Clostridiales;f__Peptostreptococcaceae;g__[Eubacterium] yurii group;s__uncultured bacterium</i>                                           | FluA | Infection | 4.25E-09 | 3.00E-08 | **** | Wilcoxon |
| <i>p__Firmicutes;c__Clostridia;o__Clostridiales;f__Peptostreptococcaceae;g__[Eubacterium] yurii group;s__uncultured bacterium</i>                                           | FluB | RSV       | 2.01E-11 | 1.60E-10 | **** | Wilcoxon |
| <i>p__Firmicutes;c__Clostridia;o__Clostridiales;f__Peptostreptococcaceae;g__[Eubacterium] yurii group;s__uncultured bacterium</i>                                           | FluB | HRV       | 2.15E-18 | 2.20E-17 | **** | Wilcoxon |
| <i>p__Firmicutes;c__Clostridia;o__Clostridiales;f__Peptostreptococcaceae;g__[Eubacterium] yurii group;s__uncultured bacterium</i>                                           | FluB | Infection | 0.000187 | 0.00093  | ***  | Wilcoxon |
| <i>p__Firmicutes;c__Clostridia;o__Clostridiales;f__Peptostreptococcaceae;g__[Eubacterium] yurii group;s__uncultured bacterium</i>                                           | RSV  | HRV       | 0.138501 | 0.14     | ns   | Wilcoxon |
| <i>p__Firmicutes;c__Clostridia;o__Clostridiales;f__Peptostreptococcaceae;g__[Eubacterium] yurii group;s__uncultured bacterium</i>                                           | RSV  | Infection | 0.001067 | 0.0043   | **   | Wilcoxon |
| <i>p__Firmicutes;c__Clostridia;o__Clostridiales;f__Peptostreptococcaceae;g__[Eubacterium] yurii group;s__uncultured bacterium</i>                                           | HRV  | Infection | 3.64E-07 | 2.20E-06 | **** | Wilcoxon |
| <i>p__Patiscibacteria;c__Gracilibacteria;o__Absconditabacteriales (SR1);f__SR1 bacterium oral taxon 875;g__SR1 bacterium oral taxon 875;s__SR1 bacterium oral taxon 875</i> | FluA | FluB      | 1.40E-05 | 9.80E-05 | **** | Wilcoxon |
| <i>p__Patiscibacteria;c__Gracilibacteria;o__Absconditabacteriales (SR1);f__SR1 bacterium oral taxon 875;g__SR1 bacterium oral taxon 875;s__SR1 bacterium oral taxon 875</i> | FluA | RSV       | 9.85E-06 | 7.90E-05 | **** | Wilcoxon |
| <i>p__Patiscibacteria;c__Gracilibacteria;o__Absconditabacteriales (SR1);f__SR1 bacterium oral taxon 875;g__SR1 bacterium oral taxon 875;s__SR1 bacterium oral taxon 875</i> | FluA | HRV       | 1.53E-05 | 9.80E-05 | **** | Wilcoxon |
| <i>p__Patiscibacteria;c__Gracilibacteria;o__Absconditabacteriales (SR1);f__SR1 bacterium oral taxon 875;g__SR1 bacterium oral taxon 875;s__SR1 bacterium oral taxon 875</i> | FluA | Infection | 1.59E-05 | 9.80E-05 | **** | Wilcoxon |
| <i>p__Patiscibacteria;c__Gracilibacteria;o__Absconditabacteriales (SR1);f__SR1 bacterium oral taxon 875;g__SR1 bacterium oral taxon 875;s__SR1 bacterium oral taxon 875</i> | FluB | RSV       | 0.098959 | 0.3      | ns   | Wilcoxon |
| <i>p__Patiscibacteria;c__Gracilibacteria;o__Absconditabacteriales (SR1);f__SR1 bacterium oral taxon 875;g__SR1 bacterium oral taxon 875;s__SR1 bacterium oral taxon 875</i> | FluB | HRV       | 0.653747 | 0.65     | ns   | Wilcoxon |
| <i>p__Patiscibacteria;c__Gracilibacteria;o__Absconditabacteriales (SR1);f__SR1 bacterium oral taxon 875;g__SR1 bacterium oral taxon 875;s__SR1 bacterium oral taxon 875</i> | FluB | Infection | 5.45E-08 | 5.50E-07 | **** | Wilcoxon |
| <i>p__Patiscibacteria;c__Gracilibacteria;o__Absconditabacteriales (SR1);f__SR1 bacterium oral taxon 875;g__SR1 bacterium oral taxon 875;s__SR1 bacterium oral taxon 875</i> | RSV  | HRV       | 0.219807 | 0.44     | ns   | Wilcoxon |
| <i>p__Patiscibacteria;c__Gracilibacteria;o__Absconditabacteriales (SR1);f__SR1 bacterium oral taxon 875;g__SR1 bacterium oral taxon 875;s__SR1 bacterium oral taxon 875</i> | RSV  | Infection | 2.03E-05 | 9.80E-05 | **** | Wilcoxon |
| <i>p__Patiscibacteria;c__Gracilibacteria;o__Absconditabacteriales (SR1);f__SR1 bacterium oral taxon 875;g__SR1 bacterium oral taxon 875;s__SR1 bacterium oral taxon 875</i> | HRV  | Infection | 6.27E-07 | 5.60E-06 | **** | Wilcoxon |
| <i>p__Fusobacteria;c__Fusobacteriia;o__Fusobacteriales;f__Leptotrichiaceae;g__Leptotrichia;s__Leptotrichia sp. oral clone FP036</i>                                         | FluA | FluB      | 5.23E-08 | 2.60E-07 | **** | Wilcoxon |
| <i>p__Fusobacteria;c__Fusobacteriia;o__Fusobacteriales;f__Leptotrichiaceae;g__Leptotrichia;s__Leptotrichia sp. oral clone FP036</i>                                         | FluA | RSV       | 3.17E-07 | 1.30E-06 | **** | Wilcoxon |
| <i>p__Fusobacteria;c__Fusobacteriia;o__Fusobacteriales;f__Leptotrichiaceae;g__Leptotrichia;s__Leptotrichia sp. oral clone FP036</i>                                         | FluA | HRV       | 7.28E-12 | 5.80E-11 | **** | Wilcoxon |
| <i>p__Fusobacteria;c__Fusobacteriia;o__Fusobacteriales;f__Leptotrichiaceae;g__Leptotrichia;s__Leptotrichia sp. oral clone FP036</i>                                         | FluA | Infection | 0.014253 | 0.029    | *    | Wilcoxon |
| <i>p__Fusobacteria;c__Fusobacteriia;o__Fusobacteriales;f__Leptotrichiaceae;g__Leptotrichia;s__Leptotrichia sp. oral clone FP036</i>                                         | FluB | RSV       | 1.74E-09 | 1.20E-08 | **** | Wilcoxon |
| <i>p__Fusobacteria;c__Fusobacteriia;o__Fusobacteriales;f__Leptotrichiaceae;g__Leptotrichia;s__Leptotrichia sp. oral clone FP036</i>                                         | FluB | HRV       | 6.18E-23 | 6.20E-22 | **** | Wilcoxon |
| <i>p__Fusobacteria;c__Fusobacteriia;o__Fusobacteriales;f__Leptotrichiaceae;g__Leptotrichia;s__Leptotrichia sp. oral clone FP036</i>                                         | FluB | Infection | 0.002755 | 0.0083   | **   | Wilcoxon |
| <i>p__Fusobacteria;c__Fusobacteriia;o__Fusobacteriales;f__Leptotrichiaceae;g__Leptotrichia;s__Leptotrichia sp. oral clone FP036</i>                                         | RSV  | HRV       | 0.159414 | 0.16     | ns   | Wilcoxon |
| <i>p__Fusobacteria;c__Fusobacteriia;o__Fusobacteriales;f__Leptotrichiaceae;g__Leptotrichia;s__Leptotrichia sp. oral clone FP036</i>                                         | RSV  | Infection | 2.46E-08 | 1.50E-07 | **** | Wilcoxon |
| <i>p__Fusobacteria;c__Fusobacteriia;o__Fusobacteriales;f__Leptotrichiaceae;g__Leptotrichia;s__Leptotrichia sp. oral clone FP036</i>                                         | HRV  | Infection | 1.53E-16 | 1.40E-15 | **** | Wilcoxon |
| <i>p__Firmicutes;c__Clostridia;o__Clostridiales;f__Lachnospiraceae;g__Oribacterium;s__Oribacterium sinus</i>                                                                | FluA | FluB      | 7.78E-07 | 5.40E-06 | **** | Wilcoxon |
| <i>p__Firmicutes;c__Clostridia;o__Clostridiales;f__Lachnospiraceae;g__Oribacterium;s__Oribacterium sinus</i>                                                                | FluA | RSV       | 3.05E-09 | 2.40E-08 | **** | Wilcoxon |
| <i>p__Firmicutes;c__Clostridia;o__Clostridiales;f__Lachnospiraceae;g__Oribacterium;s__Oribacterium sinus</i>                                                                | FluA | HRV       | 1.63E-11 | 1.60E-10 | **** | Wilcoxon |
| <i>p__Firmicutes;c__Clostridia;o__Clostridiales;f__Lachnospiraceae;g__Oribacterium;s__Oribacterium sinus</i>                                                                | FluA | Infection | 1.42E-10 | 1.30E-09 | **** | Wilcoxon |
| <i>p__Firmicutes;c__Clostridia;o__Clostridiales;f__Lachnospiraceae;g__Oribacterium;s__Oribacterium sinus</i>                                                                | FluB | RSV       | 0.383294 | 1        | ns   | Wilcoxon |
| <i>p__Firmicutes;c__Clostridia;o__Clostridiales;f__Lachnospiraceae;g__Oribacterium;s__Oribacterium sinus</i>                                                                | FluB | HRV       | 0.004697 | 0.028    | **   | Wilcoxon |

|                                                                                                                    |      |           |          |       |    |          |
|--------------------------------------------------------------------------------------------------------------------|------|-----------|----------|-------|----|----------|
| <i>p__Firmicutes;c__Clostridia;o__Clostridiales;f__Lachnospiraceae;g__Oribacterium;s__Oribacterium sinus</i>       | FluB | Infection | 0.083102 | 0.42  | ns | Wilcoxon |
| <i>p__Firmicutes;c__Clostridia;o__Clostridiales;f__Lachnospiraceae;g__Oribacterium;s__Oribacterium sinus</i>       | RSV  | HRV       | 0.300664 | 1     | ns | Wilcoxon |
| <i>p__Firmicutes;c__Clostridia;o__Clostridiales;f__Lachnospiraceae;g__Oribacterium;s__Oribacterium sinus</i>       | RSV  | Infection | 0.909065 | 1     | ns | Wilcoxon |
| <i>p__Firmicutes;c__Clostridia;o__Clostridiales;f__Lachnospiraceae;g__Oribacterium;s__Oribacterium sinus</i>       | HRV  | Infection | 0.532642 | 1     | ns | Wilcoxon |
| <i>p__Firmicutes;c__Clostridia;o__Clostridiales;f__Lachnospiraceae;g__Oribacterium;s__Oribacterium parvum ACB1</i> | FluA | FluB      | 0.066916 | 0.33  | ns | Wilcoxon |
| <i>p__Firmicutes;c__Clostridia;o__Clostridiales;f__Lachnospiraceae;g__Oribacterium;s__Oribacterium parvum ACB1</i> | FluA | RSV       | 0.002375 | 0.024 | ** | Wilcoxon |
| <i>p__Firmicutes;c__Clostridia;o__Clostridiales;f__Lachnospiraceae;g__Oribacterium;s__Oribacterium parvum ACB1</i> | FluA | HRV       | 0.008529 | 0.06  | ** | Wilcoxon |
| <i>p__Firmicutes;c__Clostridia;o__Clostridiales;f__Lachnospiraceae;g__Oribacterium;s__Oribacterium parvum ACB1</i> | FluA | Infection | 0.203285 | 0.81  | ns | Wilcoxon |
| <i>p__Firmicutes;c__Clostridia;o__Clostridiales;f__Lachnospiraceae;g__Oribacterium;s__Oribacterium parvum ACB1</i> | FluB | RSV       | 0.003885 | 0.031 | ** | Wilcoxon |
| <i>p__Firmicutes;c__Clostridia;o__Clostridiales;f__Lachnospiraceae;g__Oribacterium;s__Oribacterium parvum ACB1</i> | FluB | HRV       | 0.002361 | 0.024 | ** | Wilcoxon |
| <i>p__Firmicutes;c__Clostridia;o__Clostridiales;f__Lachnospiraceae;g__Oribacterium;s__Oribacterium parvum ACB1</i> | FluB | Infection | 0.312946 | 0.94  | ns | Wilcoxon |
| <i>p__Firmicutes;c__Clostridia;o__Clostridiales;f__Lachnospiraceae;g__Oribacterium;s__Oribacterium parvum ACB1</i> | RSV  | HRV       | 0.626976 | 1     | ns | Wilcoxon |
| <i>p__Firmicutes;c__Clostridia;o__Clostridiales;f__Lachnospiraceae;g__Oribacterium;s__Oribacterium parvum ACB1</i> | RSV  | Infection | 0.021042 | 0.13  | *  | Wilcoxon |
| <i>p__Firmicutes;c__Clostridia;o__Clostridiales;f__Lachnospiraceae;g__Oribacterium;s__Oribacterium parvum ACB1</i> | HRV  | Infection | 0.792703 | 1     | ns | Wilcoxon |

**Table S4.** The Spearman interaction of differential pathways, differential ARGs, ARGs count, and differential species in the FluA group and healthy controls.

| <b>Objects (A &amp; B means A interacts with B)</b>                                                                     | <b>R value</b> |
|-------------------------------------------------------------------------------------------------------------------------|----------------|
| <i>Veillonella unclassified</i> & PWY-5840: superpathway of menaquinol-7 biosynthesis                                   | 0.775          |
| <i>Veillonella unclassified</i> & PWY-5899: superpathway of menaquinol-13 biosynthesis                                  | 0.771          |
| <i>Veillonella unclassified</i> & PWY-5898: superpathway of menaquinol-12 biosynthesis                                  | 0.771          |
| <i>Veillonella unclassified</i> & PWY-5897: superpathway of menaquinol-11 biosynthesis                                  | 0.771          |
| <i>Veillonella unclassified</i> & PWY-5837: 1,4-dihydroxy-2-naphthoate biosynthesis I                                   | 0.782          |
| <i>Veillonella unclassified</i> & PWY-5791: 1,4-dihydroxy-2-naphthoate biosynthesis II (plants)                         | 0.782          |
| <i>Veillonella unclassified</i> & PWY-5005: biotin biosynthesis II                                                      | 0.833          |
| <i>Veillonella parvula</i> & PWY-5005: biotin biosynthesis II                                                           | 0.773          |
| PWY-6897: thiamin salvage II & <i>Streptococcus constellatus</i>                                                        | 0.660          |
| PWY-6897: thiamin salvage II & <i>Rothia mucilaginosa</i>                                                               | -0.502         |
| COA-PWY: coenzyme A biosynthesis I & <i>Veillonella parvula</i>                                                         | 0.504          |
| COA-PWY: coenzyme A biosynthesis I & <i>Rothia mucilaginosa</i>                                                         | -0.555         |
| ARO_3003479 <i>tetR</i> & PWY-5840: superpathway of menaquinol-7 biosynthesis                                           | -0.776         |
| ARO_3003479 <i>tetR</i> & ARG+POLYAMINE-SYN: superpathway of arginine and polyamine biosynthesis                        | -0.760         |
| ARO_3003479 <i>tetR</i> & ARGs count                                                                                    | 0.714          |
| ARO_3003479 <i>tetR</i> & <i>Veillonella unclassified</i>                                                               | -0.723         |
| ARO_3003479 <i>tetR</i> & <i>Rothia mucilaginosa</i>                                                                    | 0.613          |
| ARO_3000165 <i>tet(A)</i> & ARG+POLYAMINE-SYN: superpathway of arginine and polyamine biosynthesis                      | -0.776         |
| ARO_3000165 <i>tet(A)</i> & ARGs count                                                                                  | 0.703          |
| ARO_3000165 <i>tet(A)</i> & <i>Veillonella unclassified</i>                                                             | -0.738         |
| ARO_3000165 <i>tet(A)</i> & <i>Rothia mucilaginosa</i>                                                                  | 0.576          |
| PWY-6147: 6-hydroxymethyl-dihydropterin diphosphate biosynthesis I & <i>Streptococcus constellatus</i>                  | 0.589          |
| PWY-6147: 6-hydroxymethyl-dihydropterin diphosphate biosynthesis I & <i>Rothia mucilaginosa</i>                         | -0.629         |
| PWY-6147: 6-hydroxymethyl-dihydropterin diphosphate biosynthesis I & <i>Lachnospiraceae oral taxon 107</i>              | 0.508          |
| SULFATE-CYS-PWY: superpathway of sulfate assimilation and cysteine biosynthesis & <i>Lachnospiraceae oral taxon 107</i> | 0.659          |
| PWY-7282: 4-amino-2-methyl-5-phosphomethylpyrimidine biosynthesis (yeast) & <i>Rothia mucilaginosa</i>                  | -0.544         |

---

|                                                                                                                   |        |
|-------------------------------------------------------------------------------------------------------------------|--------|
| PWY-7282: 4-amino-2-methyl-5-phosphomethylpyrimidine biosynthesis (yeast) & <i>Lachnospiraceae</i> oral taxon 107 | 0.682  |
| PWY-5154: L-arginine biosynthesis III (via N-acetyl-L-citrulline) & ARO_3000194 <i>tetW</i>                       | 0.473  |
| PWY-5154: L-arginine biosynthesis III (via N-acetyl-L-citrulline) & <i>Veillonella unclassified</i>               | 0.626  |
| PWY-5154: L-arginine biosynthesis III (via N-acetyl-L-citrulline) & <i>Veillonella parvula</i>                    | 0.523  |
| PWY-5154: L-arginine biosynthesis III (via N-acetyl-L-citrulline) & <i>Rothia mucilaginosa</i>                    | -0.594 |
| PWY-5154: L-arginine biosynthesis III (via N-acetyl-L-citrulline) & <i>Lachnospiraceae</i> oral taxon 107         | 0.464  |
| PANTOSYN-PWY: pantothenate and coenzyme A biosynthesis I & <i>Veillonella unclassified</i>                        | 0.574  |
| PANTOSYN-PWY: pantothenate and coenzyme A biosynthesis I & <i>Rothia mucilaginosa</i>                             | -0.630 |
| PANTOSYN-PWY: pantothenate and coenzyme A biosynthesis I & <i>Lachnospiraceae</i> oral taxon 107                  | 0.598  |
| PANTOSYN-PWY: pantothenate and coenzyme A biosynthesis I & <i>Atopobium rimae</i>                                 | 0.648  |
| P42-PWY: incomplete reductive TCA cycle & <i>Veillonella unclassified</i>                                         | 0.447  |
| P42-PWY: incomplete reductive TCA cycle & <i>Lachnospiraceae</i> oral taxon 107                                   | 0.585  |
| P42-PWY: incomplete reductive TCA cycle & <i>Atopobium rimae</i>                                                  | 0.600  |
| POLYAMSYN-PWY: superpathway of polyamine biosynthesis I & ARO_3003479 <i>tetR</i>                                 | -0.729 |
| POLYAMSYN-PWY: superpathway of polyamine biosynthesis I & ARO_3000165 <i>tet(A)</i>                               | -0.738 |
| POLYAMSYN-PWY: superpathway of polyamine biosynthesis I & ARO_3000194 <i>tetW</i>                                 | 0.458  |
| POLYAMSYN-PWY: superpathway of polyamine biosynthesis I & ARGs count                                              | -0.615 |
| POLYAMSYN-PWY: superpathway of polyamine biosynthesis I & <i>Veillonella unclassified</i>                         | 0.651  |
| POLYAMSYN-PWY: superpathway of polyamine biosynthesis I & <i>Rothia mucilaginosa</i>                              | -0.528 |
| POLYAMSYN-PWY: superpathway of polyamine biosynthesis I & <i>Atopobium rimae</i>                                  | 0.471  |
| PWY-5840: superpathway of menaquinol-7 biosynthesis & ARO_3003479 <i>tetR</i>                                     | -0.776 |
| PWY-5840: superpathway of menaquinol-7 biosynthesis & ARO_3000165 <i>tet(A)</i>                                   | -0.756 |
| PWY-5840: superpathway of menaquinol-7 biosynthesis & ARGs count                                                  | -0.747 |
| PWY-5840: superpathway of menaquinol-7 biosynthesis & <i>Veillonella unclassified</i>                             | 0.775  |
| PWY-5840: superpathway of menaquinol-7 biosynthesis & <i>Veillonella parvula</i>                                  | 0.588  |

---

---

|                                                                                                    |        |
|----------------------------------------------------------------------------------------------------|--------|
| PWY-5840: superpathway of menaquinol-7 biosynthesis & <i>Rothia mucilaginosa</i>                   | -0.669 |
| PWY-5840: superpathway of menaquinol-7 biosynthesis & <i>Atopobium rimae</i>                       | 0.644  |
| PWY-4242: pantothenate and coenzyme A biosynthesis III & <i>Veillonella unclassified</i>           | 0.534  |
| PWY-4242: pantothenate and coenzyme A biosynthesis III & <i>Veillonella parvula</i>                | 0.568  |
| PWY-4242: pantothenate and coenzyme A biosynthesis III & <i>Rothia mucilaginosa</i>                | -0.711 |
| PWY-4242: pantothenate and coenzyme A biosynthesis III & <i>Lachnospiraceae oral taxon 107</i>     | 0.514  |
| PWY-4242: pantothenate and coenzyme A biosynthesis III & <i>Atopobium rimae</i>                    | 0.616  |
| PWY-5899: superpathway of menaquinol-13 biosynthesis & ARO_3003479 <i>tetR</i>                     | -0.510 |
| PWY-5899: superpathway of menaquinol-13 biosynthesis & ARO_3000165 <i>tet(A)</i>                   | -0.543 |
| PWY-5899: superpathway of menaquinol-13 biosynthesis & <i>Veillonella unclassified</i>             | 0.771  |
| PWY-5899: superpathway of menaquinol-13 biosynthesis & <i>Veillonella parvula</i>                  | 0.665  |
| PWY-5899: superpathway of menaquinol-13 biosynthesis & <i>Rothia mucilaginosa</i>                  | -0.710 |
| PWY-5899: superpathway of menaquinol-13 biosynthesis & <i>Lachnospiraceae oral taxon 107</i>       | 0.559  |
| PWY-5899: superpathway of menaquinol-13 biosynthesis & <i>Atopobium rimae</i>                      | 0.681  |
| PWY-5898: superpathway of menaquinol-12 biosynthesis & ARO_3003479 <i>tetR</i>                     | -0.510 |
| PWY-5898: superpathway of menaquinol-12 biosynthesis & ARO_3000165 <i>tet(A)</i>                   | -0.543 |
| PWY-5898: superpathway of menaquinol-12 biosynthesis & <i>Veillonella unclassified</i>             | 0.771  |
| PWY-5898: superpathway of menaquinol-12 biosynthesis & <i>Veillonella parvula</i>                  | 0.665  |
| PWY-5898: superpathway of menaquinol-12 biosynthesis & <i>Rothia mucilaginosa</i>                  | -0.710 |
| PWY-5898: superpathway of menaquinol-12 biosynthesis & <i>Lachnospiraceae oral taxon 107</i>       | 0.559  |
| PWY-5898: superpathway of menaquinol-12 biosynthesis & <i>Atopobium rimae</i>                      | 0.681  |
| PWY-5897: superpathway of menaquinol-11 biosynthesis & ARO_3003479 <i>tetR</i>                     | -0.510 |
| PWY-5897: superpathway of menaquinol-11 biosynthesis & ARO_3000165 <i>tet(A)</i>                   | -0.543 |
| PWY-5897: superpathway of menaquinol-11 biosynthesis & <i>Veillonella unclassified</i>             | 0.771  |
| PWY-5897: superpathway of menaquinol-11 biosynthesis & <i>Veillonella parvula</i>                  | 0.665  |
| PWY-5897: superpathway of menaquinol-11 biosynthesis & <i>Rothia mucilaginosa</i>                  | -0.710 |
| PWY-5897: superpathway of menaquinol-11 biosynthesis & <i>Lachnospiraceae oral taxon 107</i>       | 0.559  |
| PWY-5897: superpathway of menaquinol-11 biosynthesis & <i>Atopobium rimae</i>                      | 0.681  |
| ARG+POLYAMINE-SYN: superpathway of arginine and polyamine biosynthesis & ARO_3003479 <i>tetR</i>   | -0.760 |
| ARG+POLYAMINE-SYN: superpathway of arginine and polyamine biosynthesis & ARO_3000165 <i>tet(A)</i> | -0.776 |
| ARG+POLYAMINE-SYN: superpathway of arginine and polyamine biosynthesis & ARO_3000194 <i>tetW</i>   | 0.507  |

---

---

|                                                                                                               |        |
|---------------------------------------------------------------------------------------------------------------|--------|
| ARG+POLYAMINE-SYN: superpathway of arginine and polyamine biosynthesis & ARGs count                           | -0.611 |
| ARG+POLYAMINE-SYN: superpathway of arginine and polyamine biosynthesis & <i>Veillonella unclassified</i>      | 0.720  |
| ARG+POLYAMINE-SYN: superpathway of arginine and polyamine biosynthesis & <i>Rothia mucilaginosa</i>           | -0.553 |
| ARG+POLYAMINE-SYN: superpathway of arginine and polyamine biosynthesis & <i>Atopobium rimae</i>               | 0.513  |
| PWY0-1586: peptidoglycan maturation (meso-diaminopimelate containing) & ARO_3003479 <i>tetR</i>               | -0.556 |
| PWY0-1586: peptidoglycan maturation (meso-diaminopimelate containing) & ARO_3000165 <i>tet(A)</i>             | -0.559 |
| PWY0-1586: peptidoglycan maturation (meso-diaminopimelate containing) & <i>Veillonella unclassified</i>       | 0.661  |
| PWY0-1586: peptidoglycan maturation (meso-diaminopimelate containing) & <i>Veillonella parvula</i>            | 0.660  |
| PWY0-1586: peptidoglycan maturation (meso-diaminopimelate containing) & <i>Rothia mucilaginosa</i>            | -0.701 |
| PWY0-1586: peptidoglycan maturation (meso-diaminopimelate containing) & <i>Lachnospiraceae oral taxon 107</i> | 0.518  |
| PWY0-1586: peptidoglycan maturation (meso-diaminopimelate containing) & <i>Atopobium rimae</i>                | 0.648  |
| PWY-5837: 1,4-dihydroxy-2-naphthoate biosynthesis I & ARO_3003479 <i>tetR</i>                                 | -0.504 |
| PWY-5837: 1,4-dihydroxy-2-naphthoate biosynthesis I & ARO_3000165 <i>tet(A)</i>                               | -0.547 |
| PWY-5837: 1,4-dihydroxy-2-naphthoate biosynthesis I & ARO_3000194 <i>tetW</i>                                 | 0.506  |
| PWY-5837: 1,4-dihydroxy-2-naphthoate biosynthesis I & ARGs count                                              | -0.474 |
| PWY-5837: 1,4-dihydroxy-2-naphthoate biosynthesis I & <i>Veillonella unclassified</i>                         | 0.782  |
| PWY-5837: 1,4-dihydroxy-2-naphthoate biosynthesis I & <i>Veillonella parvula</i>                              | 0.727  |
| PWY-5837: 1,4-dihydroxy-2-naphthoate biosynthesis I & <i>Rothia mucilaginosa</i>                              | -0.703 |
| PWY-5837: 1,4-dihydroxy-2-naphthoate biosynthesis I & <i>Atopobium rimae</i>                                  | 0.582  |
| PWY-5791: 1,4-dihydroxy-2-naphthoate biosynthesis II (plants) & ARO_3003479 <i>tetR</i>                       | -0.504 |
| PWY-5791: 1,4-dihydroxy-2-naphthoate biosynthesis II (plants) & ARO_3000165 <i>tet(A)</i>                     | -0.547 |
| PWY-5791: 1,4-dihydroxy-2-naphthoate biosynthesis II (plants) & ARO_3000194 <i>tetW</i>                       | 0.506  |
| PWY-5791: 1,4-dihydroxy-2-naphthoate biosynthesis II (plants) & ARGs count                                    | -0.474 |
| PWY-5791: 1,4-dihydroxy-2-naphthoate biosynthesis II (plants) & <i>Veillonella unclassified</i>               | 0.782  |
| PWY-5791: 1,4-dihydroxy-2-naphthoate biosynthesis II (plants) & <i>Veillonella parvula</i>                    | 0.727  |
| PWY-5791: 1,4-dihydroxy-2-naphthoate biosynthesis II (plants) & <i>Rothia mucilaginosa</i>                    | -0.703 |

---

---

|                                                                                        |        |
|----------------------------------------------------------------------------------------|--------|
| PWY-5791: 1,4-dihydroxy-2-naphthoate biosynthesis II (plants) & <i>Atopobium rimae</i> | 0.582  |
| PWY-5005: biotin biosynthesis II & ARO_3003479 <i>tetR</i>                             | -0.555 |
| PWY-5005: biotin biosynthesis II & ARO_3000165 <i>tet(A)</i>                           | -0.590 |
| PWY-5005: biotin biosynthesis II & ARO_3000194 <i>tetW</i>                             | 0.468  |
| PWY-5005: biotin biosynthesis II & ARGs count                                          | -0.575 |
| PWY-5005: biotin biosynthesis II & <i>Veillonella unclassified</i>                     | 0.833  |
| PWY-5005: biotin biosynthesis II & <i>Veillonella parvula</i>                          | 0.773  |
| PWY-5005: biotin biosynthesis II & <i>Rothia mucilaginosa</i>                          | -0.594 |
| PWY-5005: biotin biosynthesis II & <i>Atopobium rimae</i>                              | 0.572  |
| ARO_3000194 <i>tetW</i> & ARGs count                                                   | -0.494 |
| ARO_3000194 <i>tetW</i> & <i>Veillonella unclassified</i>                              | 0.644  |
| ARO_3000194 <i>tetW</i> & <i>Aggregatibacter unclassified</i>                          | -0.517 |
| ARGs count & <i>Veillonella unclassified</i>                                           | -0.703 |
| ARGs count & <i>Gemella morbillorum</i>                                                | 0.473  |
| ARGs count & <i>Atopobium rimae</i>                                                    | -0.459 |
| ARGs count & <i>Aggregatibacter unclassified</i>                                       | 0.449  |

---



**Table S5. The growth rate of potential pathogens in situ calculated by GRID algorithm**

| <b>Potential pathogens</b>     | <b>Growth rate</b> | <b>Coverage</b> | <b>Groups</b> |
|--------------------------------|--------------------|-----------------|---------------|
| <i>Fusobacterium nucleatum</i> | 2.06               | 3.33            | FluB          |
| <i>Fusobacterium nucleatum</i> | 2.04               | 4.28            | FluA/FluB     |
| <i>Fusobacterium nucleatum</i> | 1.84               | 20.81           | FluB          |
| <i>Fusobacterium nucleatum</i> | 1.44               | 13.78           | FluB          |
| <i>Fusobacterium nucleatum</i> | 1.75               | 0.99            | FluA          |
| <i>Fusobacterium nucleatum</i> | 1.73               | 10.53           | FluA          |
| <i>Fusobacterium nucleatum</i> | 1.46               | 1.49            | FluA          |
| <i>Fusobacterium nucleatum</i> | 1.7                | 4.70            | FluB          |
| <i>Fusobacterium nucleatum</i> | 1.37               | 0.42            | FluA/FluB     |
| <i>Fusobacterium nucleatum</i> | 1.54               | 0.28            | FluA          |
| <i>Fusobacterium nucleatum</i> | 1.48               | 0.26            | FluA          |
| <i>Fusobacterium nucleatum</i> | 1.79               | 0.24            | FluA          |
| <i>Fusobacterium nucleatum</i> | 1.86               | 19.31           | FluA/FluB     |
| <i>Fusobacterium nucleatum</i> | 1.59               | 1.60            | FluA          |
| <i>Fusobacterium nucleatum</i> | 1                  | 0.27            | FluB          |
| <i>Fusobacterium nucleatum</i> | 1.45               | 1.18            | FluA/FluB     |
| <i>Fusobacterium nucleatum</i> | 1.62               | 2.41            | FluA          |
| <i>Fusobacterium nucleatum</i> | 1.81               | 1.36            | FluA/FluB     |
| <i>Fusobacterium nucleatum</i> | 2.27               | 1.85            | FluA/FluB     |
| <i>Fusobacterium nucleatum</i> | 1.98               | 4.82            | FluA/FluB     |
| <i>Fusobacterium nucleatum</i> | 2.03               | 6.65            | FluA          |
| <i>Fusobacterium nucleatum</i> | 2.01               | 2.41            | FluA/FluB     |
| <i>Fusobacterium nucleatum</i> | 2.36               | 0.90            | FluA/FluB     |
| <i>Fusobacterium nucleatum</i> | 1.72               | 1.23            | FluA          |
| <i>Fusobacterium nucleatum</i> | 1.66               | 2.65            | FluA/FluB     |
| <i>Fusobacterium nucleatum</i> | 2.01               | 6.18            | FluB          |
| <i>Fusobacterium nucleatum</i> | 1.63               | 0.28            | FluB          |
| <i>Fusobacterium nucleatum</i> | 1.63               | 0.77            | FluB          |
| <i>Fusobacterium nucleatum</i> | 1.63               | 20.04           | FluB          |
| <i>Fusobacterium nucleatum</i> | 1.6                | 1.17            | Health        |
| <i>Fusobacterium nucleatum</i> | 2.21               | 1.44            | Health        |
| <i>Fusobacterium nucleatum</i> | 1.46               | 0.24            | Health        |
| <i>Fusobacterium nucleatum</i> | 2.08               | 2.17            | Health        |
| <i>Fusobacterium nucleatum</i> | 1.38               | 0.57            | Health        |
| <i>Fusobacterium nucleatum</i> | 1.57               | 1.16            | Health        |
| <i>Fusobacterium nucleatum</i> | 1.7                | 0.70            | Health        |
| <i>Fusobacterium nucleatum</i> | 1.63               | 0.28            | Health        |
| <i>Fusobacterium nucleatum</i> | 1.45               | 1.09            | Health        |
| <i>Fusobacterium nucleatum</i> | 1.59               | 0.61            | Health        |
| <i>Haemophilus influenzae</i>  | 1                  | 0.23            | FluA/FluB     |
| <i>Haemophilus influenzae</i>  | 1.45               | 1.18            | FluB          |

|                               |      |      |           |
|-------------------------------|------|------|-----------|
| <i>Haemophilus influenzae</i> | 1.31 | 1.05 | FluB      |
| <i>Haemophilus influenzae</i> | 1.24 | 0.24 | FluB      |
| <i>Haemophilus influenzae</i> | 1.53 | 0.82 | FluA      |
| <i>Haemophilus influenzae</i> | 1.47 | 0.42 | FluA      |
| <i>Haemophilus influenzae</i> | 1.12 | 0.91 | FluB      |
| <i>Haemophilus influenzae</i> | 1.55 | 0.35 | FluA/FluB |
| <i>Haemophilus influenzae</i> | 1.35 | 1.64 | FluA      |
| <i>Haemophilus influenzae</i> | 1    | 0.37 | FluB      |
| <i>Haemophilus influenzae</i> | 1    | 0.36 | FluA/FluB |
| <i>Haemophilus influenzae</i> | 1.69 | 5.66 | FluA/FluB |
| <i>Haemophilus influenzae</i> | 1    | 0.42 | FluA/FluB |
| <i>Haemophilus influenzae</i> | 1.21 | 1.64 | FluA      |
| <i>Haemophilus influenzae</i> | 1.27 | 3.55 | FluA/FluB |
| <i>Haemophilus influenzae</i> | 1.31 | 0.51 | FluA/FluB |
| <i>Haemophilus influenzae</i> | 1.53 | 0.98 | FluA/FluB |
| <i>Haemophilus influenzae</i> | 1.7  | 0.81 | FluB      |
| <i>Haemophilus influenzae</i> | 1.19 | 1.01 | FluB      |
| <i>Haemophilus influenzae</i> | 1.5  | 0.29 | Health    |
| <i>Haemophilus influenzae</i> | 1.22 | 0.34 | Health    |
| <i>Haemophilus influenzae</i> | 1.26 | 0.87 | Health    |
| <i>Haemophilus influenzae</i> | 1.13 | 1.09 | Health    |
| <i>Haemophilus influenzae</i> | 1.2  | 0.48 | Health    |
| <i>Haemophilus influenzae</i> | 1    | 0.21 | Health    |
| <i>Haemophilus influenzae</i> | 1    | 0.22 | Health    |
| <i>Haemophilus sputorum</i>   | 1    | 0.53 | FluB      |
| <i>Haemophilus sputorum</i>   | 2.36 | 1.19 | FluA/FluB |
| <i>Haemophilus sputorum</i>   | 8.61 | 3.33 | FluB      |
| <i>Haemophilus sputorum</i>   | 2.2  | 6.01 | FluB      |
| <i>Haemophilus sputorum</i>   | 1    | 0.21 | FluB      |
| <i>Haemophilus sputorum</i>   | 2.32 | 6.78 | FluA      |
| <i>Haemophilus sputorum</i>   | 2.44 | 1.89 | FluA      |
| <i>Haemophilus sputorum</i>   | 3.01 | 2.72 | FluB      |
| <i>Haemophilus sputorum</i>   | 2.09 | 0.41 | FluA/FluB |
| <i>Haemophilus sputorum</i>   | 3.82 | 1.07 | FluA      |
| <i>Haemophilus sputorum</i>   | 2.04 | 0.38 | FluA      |
| <i>Haemophilus sputorum</i>   | 1    | 0.54 | FluB      |
| <i>Haemophilus sputorum</i>   | 2.04 | 1.95 | FluA/FluB |
| <i>Haemophilus sputorum</i>   | 2.47 | 0.42 | FluA      |
| <i>Haemophilus sputorum</i>   | 2.31 | 1.92 | FluA/FluB |
| <i>Haemophilus sputorum</i>   | 3.04 | 1.30 | FluA/FluB |
| <i>Haemophilus sputorum</i>   | 1    | 1.45 | FluA/FluB |
| <i>Haemophilus sputorum</i>   | 2.39 | 4.24 | FluA/FluB |
| <i>Haemophilus sputorum</i>   | 1    | 0.29 | FluA/FluB |
| <i>Haemophilus sputorum</i>   | 3.55 | 0.46 | FluA      |

|                                 |      |      |           |
|---------------------------------|------|------|-----------|
| <i>Haemophilus sputorum</i>     | 4.55 | 1.03 | FluA/FluB |
| <i>Haemophilus sputorum</i>     | 1    | 0.95 | FluB      |
| <i>Haemophilus sputorum</i>     | 1    | 0.26 | FluB      |
| <i>Haemophilus sputorum</i>     | 1    | 0.20 | FluB      |
| <i>Haemophilus sputorum</i>     | 3.36 | 0.47 | FluB      |
| <i>Haemophilus sputorum</i>     | 1    | 0.48 | Health    |
| <i>Haemophilus sputorum</i>     | 1    | 0.40 | Health    |
| <i>Haemophilus sputorum</i>     | 1.95 | 2.79 | Health    |
| <i>Haemophilus sputorum</i>     | 2.47 | 2.22 | Health    |
| <i>Haemophilus sputorum</i>     | 2.19 | 1.63 | Health    |
| <i>Haemophilus sputorum</i>     | 1.78 | 0.60 | Health    |
| <i>Haemophilus sputorum</i>     | 2.77 | 0.32 | Health    |
| <i>Haemophilus sputorum</i>     | 1.86 | 1.06 | Health    |
| <i>Haemophilus sputorum</i>     | 1    | 0.61 | Health    |
| <i>Porphyromonas gingivalis</i> | 1    | 0.53 | FluA/FluB |
| <i>Porphyromonas gingivalis</i> | 1.04 | 8.68 | FluB      |
| <i>Porphyromonas gingivalis</i> | 1    | 0.21 | FluA      |
| <i>Porphyromonas gingivalis</i> | 1.14 | 8.29 | FluB      |
| <i>Porphyromonas gingivalis</i> | 1.06 | 1.42 | FluA/FluB |
| <i>Porphyromonas gingivalis</i> | 1.43 | 0.66 | FluA      |
| <i>Porphyromonas gingivalis</i> | 1.37 | 1.84 | FluA      |
| <i>Porphyromonas gingivalis</i> | 1.28 | 0.28 | FluA      |
| <i>Porphyromonas gingivalis</i> | 1.28 | 1.93 | FluA/FluB |
| <i>Porphyromonas gingivalis</i> | 1.11 | 4.60 | FluA      |
| <i>Porphyromonas gingivalis</i> | 1.13 | 1.09 | FluB      |
| <i>Porphyromonas gingivalis</i> | 1.17 | 4.63 | FluA      |
| <i>Porphyromonas gingivalis</i> | 1.28 | 1.38 | FluA/FluB |
| <i>Porphyromonas gingivalis</i> | 1.18 | 0.58 | FluA      |
| <i>Porphyromonas gingivalis</i> | 1.2  | 4.49 | FluA/FluB |
| <i>Porphyromonas gingivalis</i> | 1.15 | 0.45 | FluB      |
| <i>Porphyromonas gingivalis</i> | 1.3  | 1.62 | FluB      |
| <i>Porphyromonas gingivalis</i> | 1.19 | 0.94 | Health    |
| <i>Porphyromonas gingivalis</i> | 1.13 | 1.31 | Health    |
| <i>Porphyromonas gingivalis</i> | 1.04 | 4.97 | Health    |
| <i>Porphyromonas gingivalis</i> | 1.24 | 6.23 | Health    |
| <i>Porphyromonas gingivalis</i> | 1.11 | 1.69 | Health    |
| <i>Porphyromonas gingivalis</i> | 1.1  | 0.73 | Health    |
| <i>Porphyromonas gingivalis</i> | 1.1  | 2.41 | Health    |
| <i>Treponema denticola</i>      | 1.27 | 0.30 | FluB      |
| <i>Treponema denticola</i>      | 1.14 | 0.44 | FluB      |
| <i>Treponema denticola</i>      | 1.48 | 0.48 | FluA      |
| <i>Treponema denticola</i>      | 1.15 | 0.59 | FluB      |
| <i>Treponema denticola</i>      | 1.4  | 1.23 | FluA/FluB |
| <i>Treponema denticola</i>      | 1.47 | 0.31 | FluA/FluB |

|                            |      |      |           |
|----------------------------|------|------|-----------|
| <i>Treponema denticola</i> | 1.27 | 0.72 | FluA      |
| <i>Treponema denticola</i> | 1.23 | 0.41 | FluB      |
| <i>Treponema denticola</i> | 1.41 | 0.25 | FluA/FluB |
| <i>Treponema denticola</i> | 1.28 | 0.32 | FluA      |
| <i>Treponema denticola</i> | 1.22 | 0.28 | FluA      |
| <i>Treponema denticola</i> | 1.19 | 0.50 | FluA/FluB |
| <i>Treponema denticola</i> | 1.25 | 0.41 | FluB      |
| <i>Treponema denticola</i> | 1.13 | 0.28 | Health    |
| <i>Treponema denticola</i> | 1.3  | 0.22 | Health    |
| <i>Treponema denticola</i> | 1.21 | 0.39 | Health    |
| <i>Treponema denticola</i> | 1.21 | 0.22 | Health    |
| <i>Treponema denticola</i> | 1.09 | 0.48 | Health    |
| <i>Treponema medium</i>    | 1.5  | 0.25 | FluA/FluB |
| <i>Treponema medium</i>    | 1.64 | 0.41 | FluB      |
| <i>Treponema medium</i>    | 1.36 | 0.41 | FluB      |
| <i>Treponema medium</i>    | 1.36 | 0.54 | FluA      |
| <i>Treponema medium</i>    | 1.37 | 0.55 | FluA      |
| <i>Treponema medium</i>    | 1.4  | 1.03 | FluB      |
| <i>Treponema medium</i>    | 1.42 | 1.00 | FluA/FluB |
| <i>Treponema medium</i>    | 1.58 | 0.40 | FluA      |
| <i>Treponema medium</i>    | 1.49 | 0.73 | FluA/FluB |
| <i>Treponema medium</i>    | 1.49 | 0.71 | FluA      |
| <i>Treponema medium</i>    | 1.28 | 0.44 | FluB      |
| <i>Treponema medium</i>    | 1.27 | 0.71 | FluA/FluB |
| <i>Treponema medium</i>    | 1.48 | 0.33 | FluA      |
| <i>Treponema medium</i>    | 1.72 | 0.24 | FluA/FluB |
| <i>Treponema medium</i>    | 1.56 | 0.53 | FluA      |
| <i>Treponema medium</i>    | 1.57 | 0.23 | FluA/FluB |
| <i>Treponema medium</i>    | 1.42 | 0.70 | FluA/FluB |
| <i>Treponema medium</i>    | 1.57 | 0.39 | FluB      |
| <i>Treponema medium</i>    | 1.42 | 0.31 | FluB      |
| <i>Treponema medium</i>    | 1.46 | 0.45 | FluB      |
| <i>Treponema medium</i>    | 1.22 | 0.32 | Health    |
| <i>Treponema medium</i>    | 1.28 | 0.29 | Health    |
| <i>Treponema medium</i>    | 1.35 | 1.14 | Health    |
| <i>Treponema medium</i>    | 1.44 | 0.48 | Health    |
| <i>Treponema medium</i>    | 1.38 | 0.42 | Health    |
| <i>Treponema medium</i>    | 1.18 | 0.45 | Health    |

---

**Table S6.** The Spearman interaction of all pathways, ARGs, and pathogens.

| <b>Objects (A &amp; B means A interacts with B)</b>                                                     | <b>R value</b> |
|---------------------------------------------------------------------------------------------------------|----------------|
| <i>Porphyromonas gingivalis</i> & PWY-5088: L-glutamate degradation VIII                                | -0.583         |
| <i>Haemophilus influenzae</i> & PWY-6305: putrescine biosynthesis IV                                    | -0.656         |
| <i>Haemophilus influenzae</i> & P161-PWY: acetylene degradation                                         | -0.592         |
| <i>Haemophilus influenzae</i> & PWY-7431: aromatic biogenic amine degradation                           | -0.567         |
| <i>Haemophilus influenzae</i> & PWY0-1298: super-pathway of pyrimidine deoxyribonucleosides degradation | -0.514         |
| <i>Treponema medium</i> & PWY-5005: biotin biosynthesis II                                              | 0.509          |
| <i>Treponema medium</i> & PWY-6147: 6-hydroxymethyl-dihydropterin diphosphate biosynthesis I            | 0.575          |
| <i>Treponema medium</i> & PWY-5897: superpathway of menaquinol-11 biosynthesis                          | 0.611          |
| <i>Treponema medium</i> & PWY-5898: superpathway of menaquinol-12 biosynthesis                          | 0.611          |
| <i>Treponema medium</i> & PWY-5899: superpathway of menaquinol-13 biosynthesis                          | 0.611          |
| <i>Treponema medium</i> & PWY-7282: 4-amino-2-methyl-5-phosphomethylpyrimidine biosynthesis             | 0.624          |
| <i>Treponema medium</i> & THISYNARA-PWY: superpathway of thiamin diphosphate biosynthesis III           | 0.649          |
| <i>Treponema denticola</i> & P122-PWY: heterolactic fermentation                                        | -0.613         |
| <i>Treponema denticola</i> & PWY-6269: adenosylcobalamin salvage from cobinamide II                     | 0.537          |
| <i>Treponema medium</i> & PWY-5837: 1,4-dihydroxy-2-naphthoate biosynthesis I                           | 0.658          |
| <i>Treponema medium</i> & PWY-5791: 1,4-dihydroxy-2-naphthoate biosynthesis II                          | 0.658          |
| <i>Treponema denticola</i> & P185-PWY: formaldehyde assimilation III                                    | 0.555          |
| <i>Treponema denticola</i> & SALVADEHYPOX-PWY: adenosine nucleotides degradation II                     | 0.580          |
| <i>Treponema denticola</i> & PWY-6353: purine nucleotides degradation II                                | 0.655          |
| <i>Treponema medium</i> & gb AGV10830_1 ARO_3002647 APH(3_-)IIIa                                        | 0.601          |
| <i>Haemophilus sputorum</i> & PWY-7197: pyrimidine deoxyribonucleotide phosphorylation                  | 0.519          |
| <i>Haemophilus sputorum</i> & PWY-5861: superpathway of demethylmenaquinol-8 biosynthesis               | 0.520          |
| <i>Haemophilus sputorum</i> & PWY-5838: superpathway of menaquinol-8 biosynthesis I                     | 0.528          |
| <i>Haemophilus sputorum</i> & PWY-6168: flavin biosynthesis III                                         | 0.531          |
| <i>Haemophilus sputorum</i> & PWY-1269: CMP-3-deoxy-D-manno-octulosonate biosynthesis I                 | 0.542          |
| <i>Haemophilus sputorum</i> & GLYCOL-GLYOXDEG-PWY: superpathway of glycol metabolism and degradation    | 0.566          |
| <i>Treponema denticola</i> & gb BAE77933_1 ARO_3000518 CRP                                              | -0.565         |
| <i>Treponema denticola</i> & gb YP_007503840_1 ARO_3000165 tet(A)                                       | -0.552         |
